# Supplementary material
Source: PubMed Central journal article supplement (PMC2734454)

# The Millisecond Intermediate in the Reaction of Nitric Oxide with Oxymyoglobin is an iron(III)-Nitrate Complex, not a Peroxynitrite

Erik T. Yukl,<sup>1</sup> Simon de Vries,<sup>2</sup> and Pierre Moënne-Loccoz<sup>1,\*</sup>

*Department of Science and Engineering, School of Medicine, Oregon Health & Science University, Beaverton, Oregon 97006-8921, and Department of Biotechnology, Delft University of Technology, Delft 2628 BC, The Netherlands.*

RECEIVED DATE (automatically inserted by publisher); plocco@ebs.ogi.edu

## Supplementary Information

### Experimental details

*NO and Mb-O<sub>2</sub> Solutions.* Lyophilized horse heart myoglobin was purchased from Sigma. The protein was dissolved in 200 mM CHES pH 9.5 to a final concentration of 1 to 2 mM and purged with argon before being brought into a glovebox with a controlled atmosphere of less than 1 ppm O<sub>2</sub> (Omni-Lab System; Vacuum Atmospheres Co.). The protein was reduced by addition of a 5-fold excess of sodium dithionite followed by dialysis against 500 mL anaerobic buffer for 2 h or passage through a Sephadex G-25 column (GE Healthcare). Complete heme reduction and dithionite removal were confirmed by UV-vis spectroscopy with a Cary 50 spectrometer. Solutions were then transferred to sealed serum bottles and exposed to <sup>16</sup>O<sub>2</sub> (Airgas) or <sup>18</sup>O<sub>2</sub> (99% <sup>18</sup>O; ICON Stable Isotopes) gas. Formation of Mb-O<sub>2</sub> was confirmed by UV-vis spectroscopy and the final Mb concentration was determined (typically 1.2 to 1.8 mM). Before drawing the solution in 2-mL RFQ syringes, the serum bottles were exposed to the glovebox to release excess O<sub>2</sub>. Saturated <sup>14</sup>N<sup>16</sup>O solutions were made by bubbling <sup>14</sup>N<sup>16</sup>O gas (Airgas) (scrubbed with 1 M KOH) into argon-purged buffer for 10 to 15 min. Alternatively, serial additions of NO gas into a sealed vial of anaerobic buffer was used for the preparation of <sup>14</sup>N<sup>16</sup>O (Airgas), <sup>15</sup>N<sup>16</sup>O (98% <sup>15</sup>N, Aldrich), and <sup>15</sup>N<sup>18</sup>O (98% <sup>15</sup>N, 95% <sup>18</sup>O, Aldrich) solutions. Solutions in sealed serum bottles were drawn in RFQ syringes using a needle attachment. To rule out any concerns with contaminant gases, experiments were also carried out using an NO donor and produced identical results and conclusions. Specifically, a concentrated solution of diethylamine NONOate (Cayman Chemical) (25 mM) was diluted to 1.4 mM in anaerobic phosphate buffer (20mM, pH 7.0), and incubating for 1 h at

room temperature in the RFQ syringes. Concentration of NO solutions was determined by titration with deoxy-Mb and ranged from 1.4 to 2.0 mM. Contamination of NO solutions with nitrite was determined using an  $\epsilon_{354} = 22.5 \text{ M}^{-1}\text{cm}^{-1}$  (Strickler S. J. & Kasha M., *J. Am. Chem. Soc.*, **1963**, 85, 2899-2901) and was found to never exceed 3 mM.

*Rapid Freeze Quench (RFQ) Experiments.* RFQ syringes were mounted in the System 1000 Chemical / Freeze Quench Apparatus (Update Instruments, Inc.) equipped with a water bath maintained at 3° C. Reaction times were controlled by varying either the ejection speed or the volume of the reactor hose. 5 ms are added to the calculated reaction time to account for time of flight and freezing in liquid ethane. Samples of 125 – 250  $\mu\text{L}$  were ejected into a glass funnel attached to an NMR tube and containing liquid ethane at  $< -120^\circ \text{C}$ . The frozen sample was packed into the tube as the assembly sat within a Teflon block cooled with liquid nitrogen to  $-100^\circ \text{C}$ . Once packed the frozen samples were stored in liquid nitrogen before analysis by resonance Raman (RR). Successful mixing and NO dioxygenation reaction was confirmed by UV-vis analysis of samples ejected into a microcentrifuge tube, and by RR analysis of samples shot into a room temperature NMR tube and frozen manually.

*Resonance Raman and UV-vis Spectroscopy.* Low temperature RR spectra ( $\sim 105 \text{ K}$ ) were obtained using a backscattering geometry on RFQ samples in NMR tubes. All spectra were collected on a custom McPherson 2061/207 spectrograph (0.67 m with variable gratings) equipped with a Princeton Instruments liquid  $\text{N}_2$ -cooled CCD detector (LN-1100PB). Excitation at 413, 351, and 637 nm was provided by a krypton laser (Innova 302, Coherent) while excitation at 514 and 458 nm were provided by an Innova I90C-3 argon ion laser. A Kaiser Optical supernotch filter was used to attenuate Rayleigh scattering at 413 nm while long-pass filters (RazorEdge, Semrock) were used for other excitation wavelengths.

**Figure S1.** Low-frequency RR spectra of Mb-<sup>16</sup>O<sub>2</sub> (A), Mb-<sup>18</sup>O<sub>2</sub> (B), Mb-<sup>16</sup>O<sub>2</sub> + <sup>14</sup>N<sup>16</sup>O at 6 ms (C) and Mb-<sup>18</sup>O<sub>2</sub> + <sup>14</sup>N<sup>16</sup>O at 6 ms.  $\lambda_{\text{exc}} = 413 \text{ nm}$ , 20 mW.

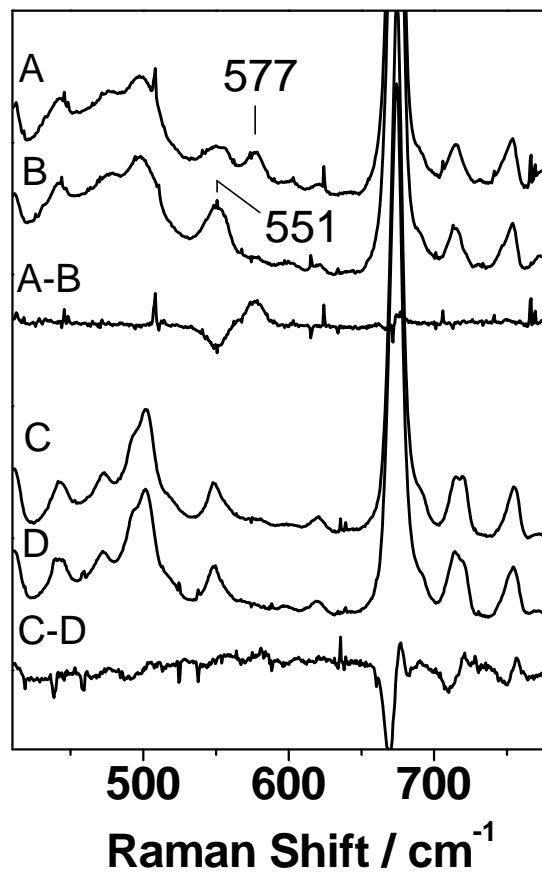

**Figure S2.** Mid-frequency RR spectra of the 6-ms RFQ samples for the reaction of <sup>15</sup>N<sup>18</sup>O with Mb-<sup>16</sup>O<sub>2</sub> (black) versus Mb-<sup>18</sup>O<sub>2</sub> (red). The difference spectrum is shown in blue.

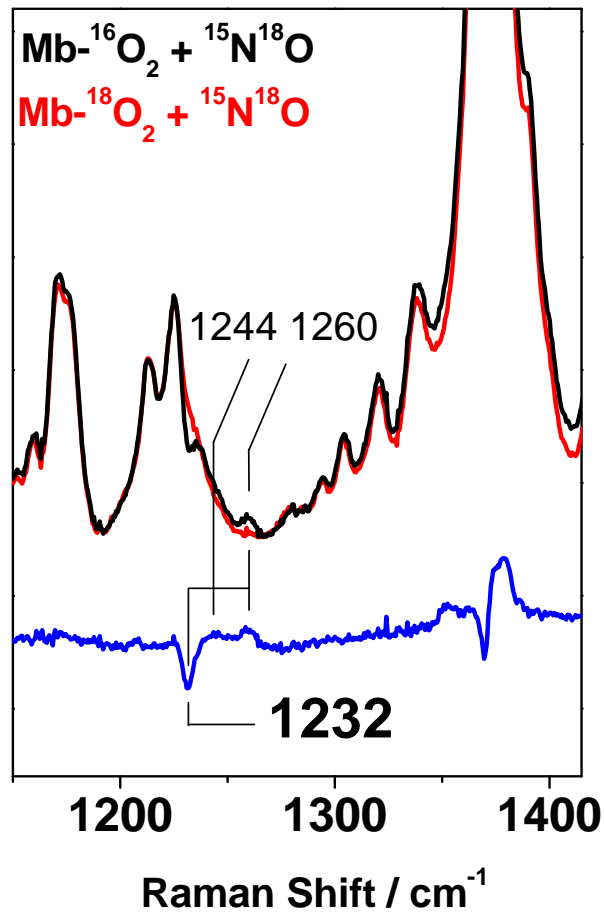

Supplement: NIHMS116803-supplement-1_si_001.pdf [file NIHMS116803-supplement-1_si_001.pdf]
